# Supplementary material for: Substitution of H Atoms in Unsaturated (Vinyl-Type) Carbocations by Cl or O Atoms
Source: MDPI journal article supplement (doi:10.3390/ijms241310734), 2023-06-27
Supplement: s1 [file s1]

## SUPPORTING INFORMATION

Substitution of H atoms in unsaturated (vinyl-type) carbocations by Cl or O atoms

*Evgenii S. Stoyanov* \*, *Irina Yu. Bagryanskaya* and *Irina V. Stoyanova*

N.N. Vorozhtsov Institute of Organic Chemistry, Siberian Branch of Russian Academy of Sciences, 630090 Novosibirsk, Russia

\* Corresponding author. E-mail address: [evgenii@nioch.nsc.ru](mailto:evgenii@nioch.nsc.ru)

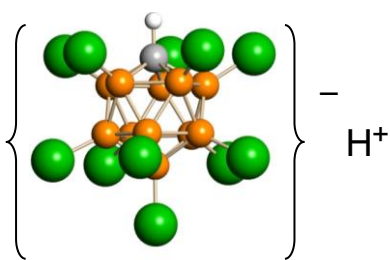

Figure S1. The super acid with icosahedral carborane anion  $\text{CHB}_{11}\text{Cl}_{11}^-$ , which was used for obtaining the carbocation salts

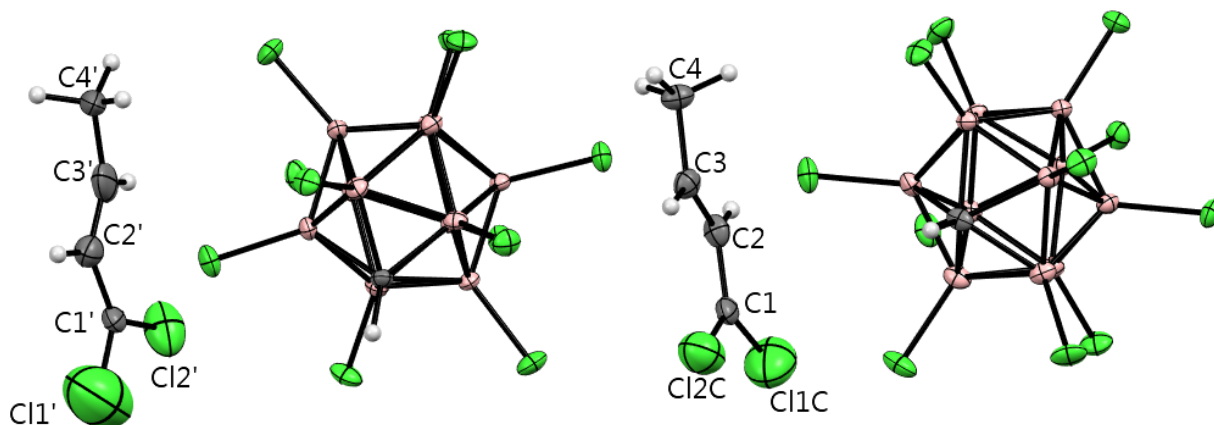

Figure S2. Crystallographically independent 1,1-dichlorobutylene cations and  $\{\text{Cl}_{11}^-\}$  anions in the crystal lattice of their salt.

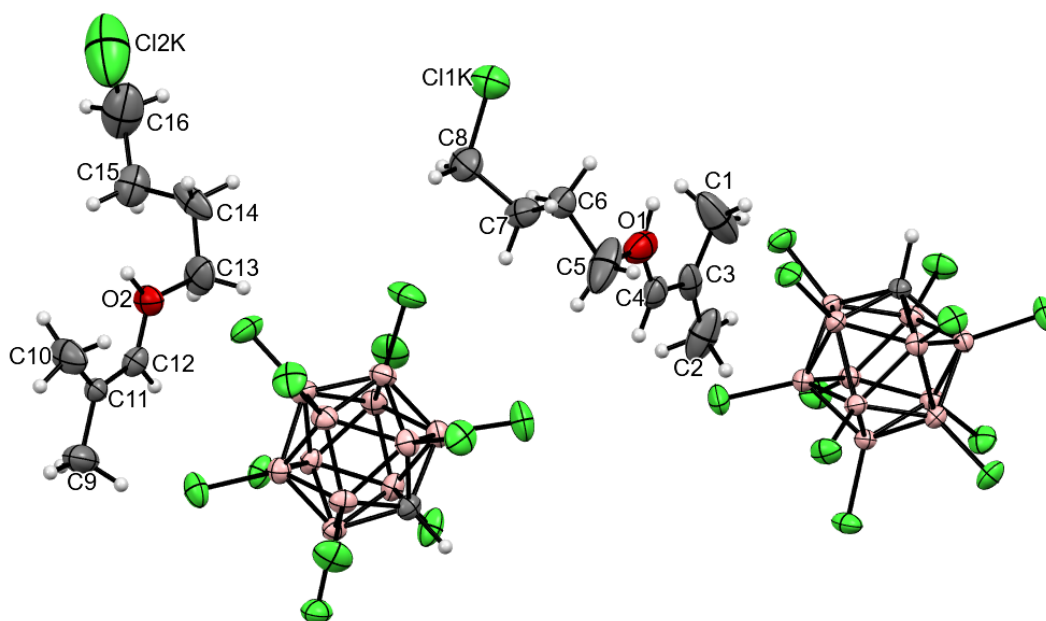

Figure S3. Crystallographically independent cations **I** and  $\{\text{Cl}_{11}^-\}$  anions in the crystal lattice of their salt.

## Crystal phase data

**Table S1**

X-ray data for compounds 1,1-dichloro-1-butylene carbocation and cations **I** and **II**

| Compound                                           | 1,1-dichloro-1-butylene <sup>+</sup>                                              | <b>I</b>                                                                | <b>II</b>                                                                            |
|----------------------------------------------------|-----------------------------------------------------------------------------------|-------------------------------------------------------------------------|--------------------------------------------------------------------------------------|
| Empirical formula                                  | C <sub>4</sub> H <sub>5</sub> Cl <sub>2</sub> +CHB <sub>11</sub> Cl <sub>11</sub> | C <sub>8</sub> H <sub>16</sub> OCl + CHB <sub>11</sub> Cl <sub>11</sub> | C <sub>8</sub> H <sub>13</sub> OCl <sub>2</sub> + CHB <sub>11</sub> Cl <sub>11</sub> |
| Formula weight                                     | 645,86                                                                            | 685.54                                                                  | 717.96                                                                               |
| Temperature K                                      | 200(2)                                                                            | 200(2)                                                                  | 200(2)                                                                               |
| Wavelength Å                                       | 0.71073                                                                           | 0.71073                                                                 | 0.71073                                                                              |
| Crystal system                                     | Triclinic                                                                         | Monoclinic                                                              | Monoclinic                                                                           |
| Space group                                        | P-1                                                                               | P2 <sub>1</sub> /c                                                      | P2 <sub>1</sub> /c                                                                   |
| Unit cell dimensions <i>a</i> Å                    | 12.5834(5)                                                                        | 16.258(4)                                                               | 16.355(5)                                                                            |
| <i>b</i> Å                                         | 14.4684(8)                                                                        | 23.118(5)                                                               | 9.979(3)                                                                             |
| <i>c</i> Å                                         | 15.0626(8)                                                                        | 15.126(3)                                                               | 17.462(5)                                                                            |
| $\alpha$ °                                         | 104.414(2)                                                                        | 90                                                                      | 90                                                                                   |
| $\beta$ °                                          | 110.117(2)                                                                        | 103.689(9)                                                              | 96.166(11)                                                                           |
| $\gamma$ °                                         | 100.501(2)                                                                        | 90                                                                      | 90                                                                                   |
| Volume Å <sup>3</sup>                              | 2383.3(2)                                                                         | 5524(2)                                                                 | 2833.3(14)                                                                           |
| Z                                                  | 4                                                                                 | 8                                                                       | 4                                                                                    |
| Density (calcd.) Mg.m <sup>-3</sup>                | 1.760                                                                             | 1.649                                                                   | 1.683                                                                                |
| Abs. coefficient mm <sup>-1</sup>                  | 1.391                                                                             | 1.210                                                                   | 1.275                                                                                |
| F(000)                                             | 1240                                                                              | 2704                                                                    | 1408                                                                                 |
| Crystal size mm <sup>3</sup>                       | 0.04 x 0.15 x 0.30                                                                | 0.20 x 0.30 x 0.30                                                      | 0.005 x 0.01 x 0.30                                                                  |
| $\Theta$ range for data collection °               | 1.52 – 26.09                                                                      | 1.29 - 30.26                                                            | 2.35 – 25.03                                                                         |
| Index ranges                                       | -15 ≤ <i>h</i> ≤ 15, -17 ≤ <i>k</i> ≤ 17, -18 ≤ <i>l</i> ≤ 18                     | -23 ≤ <i>h</i> ≤ 23, -32 ≤ <i>k</i> ≤ 32, -19 ≤ <i>l</i> ≤ 21           | -19 ≤ <i>h</i> ≤ 19, -11 ≤ <i>k</i> ≤ 11, -20 ≤ <i>l</i> ≤ 20                        |
| Reflections collected                              | 25683                                                                             | 93831                                                                   | 24561                                                                                |
| Independent reflections                            | 9386 R(int) = 0.071                                                               | 16365 R(int) = 0.056                                                    | 4986 R(int) = 0.155                                                                  |
| Completeness to $\theta$ %                         | 99.7                                                                              | 99.7                                                                    | 99.6                                                                                 |
| Data / restraints / parameters                     | 9386 / 0 / 531                                                                    | 16365 / 16 / 633                                                        | 4986/42 / 308                                                                        |
| Goodness-of-fit on <i>F</i> <sup>2</sup>           | 1.03                                                                              | 1.05                                                                    | 1.12                                                                                 |
| Final R indices <i>I</i> > 2 $\sigma$ ( <i>I</i> ) | R <sub>1</sub> = 0.0627, wR <sub>2</sub> = 0.1659                                 | R <sub>1</sub> = 0.0573, wR <sub>2</sub> = 0.1613                       | R <sub>1</sub> = 0.1180, wR <sub>2</sub> = 0.2667                                    |
| Final R indices (all data)                         | R <sub>1</sub> = 0.1028, wR <sub>2</sub> = 0.1938                                 | R <sub>1</sub> = 0.0722, wR <sub>2</sub> = 0.1733                       | R <sub>1</sub> = 0.2138, wR <sub>2</sub> = 0.2893                                    |
| Largest diff. peak / hole e.Å <sup>-3</sup>        | 1.28 / -1.25                                                                      | 1.57 / -1.30                                                            | 0.96/ -0.78                                                                          |
| CCDC                                               |                                                                                   |                                                                         |                                                                                      |

Table S2. Selected bond lengths (Å) and bond angles (°) for the 1,1-dichloro-1-butylene cation (two independent molecules):

| Molecule 1   |            | Molecule 2      |            |
|--------------|------------|-----------------|------------|
| Bond         | Length (Å) | Bond            | Length (Å) |
| C1–Cl1c      | 1.629(9)   | C1'–Cl1c'       | 1.601(9)   |
| C1–Cl2c      | 1.671(8)   | C1'–Cl2c'       | 1.621(8)   |
| C1–C2        | 1.395(10)  | C1'–C2'         | 1.359(11)  |
| C2–C3        | 1.325(11)  | C2'–C3'         | 1.299(13)  |
| C3–C4        | 1.497(10)  | C3'–C4'         |            |
| Bond angles  | (°)        | Bond angles     | (°)        |
| Cl1c–C1–Cl2c | 119.6(5)   | Cl1c'–C1'–Cl2c' | 117.5(6)   |
| Cl1c–C1–C2   | 118.0(6)   | Cl1c'–C1'–C2'   | 115.3(7)   |
| Cl2c–C1–C2   | 122.2(6)   | Cl2c'–C1'–C2'   | 126.9(6)   |
| C1–C2–C3     | 121.8(7)   | C1'–C2'–C3'     | 124.0(9)   |
| C2–C3–C4     | 125.0(6)   | C2'–C3'–C4'     | 129.7(10)  |

Table S3. Selected bond lengths (Å) and bond angles (°) for cation **I** (two independent molecules):

| Molecule 1   |            | Molecule 2     |            |
|--------------|------------|----------------|------------|
| Bond         | Length (Å) | Bond           | Length (Å) |
| Cl1K–C8      | 1.775(5)   | Cl2K–C16       | 1.738(9)   |
| O1–C4        | 1.269(5)   | O2–C12         | 1.287(4)   |
| O1–C5        | 1.435(9)   | O2–C13         | 1.475(6)   |
| O1–C5'       | 1.435(9)   | O2–C13'        | 1.475(6)   |
| C1–C3        | 1.451(9)   | C9–C11         | 1.456(5)   |
| C2–C3        | 1.455(8)   | C10–C11        | 1.456(7)   |
| C3–C4        | 1.274(6)   | C11–C12        | 1.278(5)   |
| C5–C6        | 1.565(9)   | C13–C14        | 1.524(10)  |
| C5'–C6'      | 1.50(2)    | C13'–C14'      | 1.40(2)    |
| C6–C7        | 1.518(9)   | C14–C15        | 1.547(13)  |
| C6'–C7'      | 1.52(3)    | C14'–C15'      | 1.50(2)    |
| C7–C8        | 1.528(8)   | C15–C16        | 1.563(12)  |
| C7'–C8'      | 1.50(2)    | C15'–C16'      | 1.55(1)    |
| Bond angles  | (°)        | Bond angles    | (°)        |
| C4–O1–C5     | 117.1(4)   | C12–O2–C13     | 115.8(3)   |
| C1–C3–C2     | 119.6(5)   | C9–C11–C10     | 117.5(4)   |
| C1–C3–C4     | 120.4(5)   | C9–C11–C12     | 120.4(3)   |
| C2–C3–C4     | 120.1(4)   | C10–C11–C12    | 121.9(3)   |
| O1–C4–C3     | 121.8(4)   | O2–C12–C11     | 121.5(3)   |
| O1–C5–C6     | 98.8(5)    | O2–C13–C14     | 108.0(4)   |
| O1–C5'–C6'   | 132(1)     | O2–C13'–C14'   | 109.5(8)   |
| C5–C6–C7     | 105.1(5)   | C13–C14–C15    | 107.5(7)   |
| C5'–C6'–C7'  | 109(2)     | C13'–C14'–C15' | 128(2)     |
| C6–C7–C8     | 109.0(5)   | C14–C15–C16    | 112.1(7)   |
| C6'–C7'–C8'  | 111(2)     | C14'–C15'–C16' | 112(1)     |
| Cl1K–C8–C7   | 114.2(4)   | Cl2K–C16–C15   | 129.6(7)   |
| Cl1K–C8'–C7' | 113.2(9)   | Cl2K–C16'–C15' | 92.6(6)    |
